# Supplementary material for: Direct synthesis of higher alcohols from syngas over modified Mo2C catalysts under mild reaction conditions
Source: Royal Society of Chemistry journal article supplement (doi:10.1039/d1cy02186a), 2022-01-01
Supplement: d1cy02186a1.pdf [file d1cy02186a1.pdf]

# Supporting Information

## Direct Synthesis of Higher Alcohols from Syngas over Modified Mo<sub>2</sub>C Catalysts under Mild Reaction Conditions

Caiqi Wang<sup>a,b</sup>, Hailing Yu<sup>a,b</sup>, Tiejun Lin<sup>a</sup>, Xingzhen Qi<sup>a,b</sup>, Fei Yu<sup>a</sup>, Liangshu Zhong<sup>a,c,\*</sup>,  
Yuhan Sun<sup>a,c,\*</sup>

<sup>a</sup> CAS Key Laboratory of Low-Carbon Conversion Science and Engineering, Shanghai  
Advanced Research Institute, Chinese Academy of Sciences, Shanghai 201203, P.R.  
China

<sup>b</sup> University of the Chinese Academy of Sciences, Beijing 100049, P.R. China

<sup>c</sup> School of Physical Science and Technology, ShanghaiTech University, Shanghai  
201203, P.R. China

\* Corresponding author.

E-mail: zhongls@sari.ac.cn (L. Zhong), sunyh@sari.ac.cn (Y. Sun).

Table S1 The element content of various catalysts determined by ICP-OES.

| Samples               | Content (wt%) |     |      |
|-----------------------|---------------|-----|------|
|                       | Rh            | K   | Mo   |
| Mo <sub>2</sub> C     | -             | -   | 74.5 |
| Rh/Mo <sub>2</sub> C  | 1.8           | -   | 73.5 |
| RhK/Mo <sub>2</sub> C | 1.6           | 4.8 | 70.3 |
| K/Mo <sub>2</sub> C   | -             | 5.2 | 71.4 |

Table S2 The catalytic performances for syngas conversion over Rh/AC and RhK/AC catalysts.

| Catalysts | CO           | CO <sub>2</sub> | Selectivity (C%, free of CO <sub>2</sub> ) |                     |         |                 |                        |
|-----------|--------------|-----------------|--------------------------------------------|---------------------|---------|-----------------|------------------------|
|           | Conversion % | Selectivity     | CH <sub>3</sub> OH                         | C <sub>2+</sub> Oxy | Olefins | CH <sub>4</sub> | C <sub>2+</sub> Alkane |
| Rh/AC     | 1.3          | 11.8            | 10.5                                       | 20.2                | 5.0     | 45.0            | 19.3                   |
| RhK/AC    | 4.5          | 25.0            | 74.1                                       | 5.0                 | 2.2     | 14.9            | 3.8                    |

Reaction conditions: 290 °C, H<sub>2</sub>/CO = 1, 3 MPa, GHSV = 1200 mL·g<sup>-1</sup>·h<sup>-1</sup>.

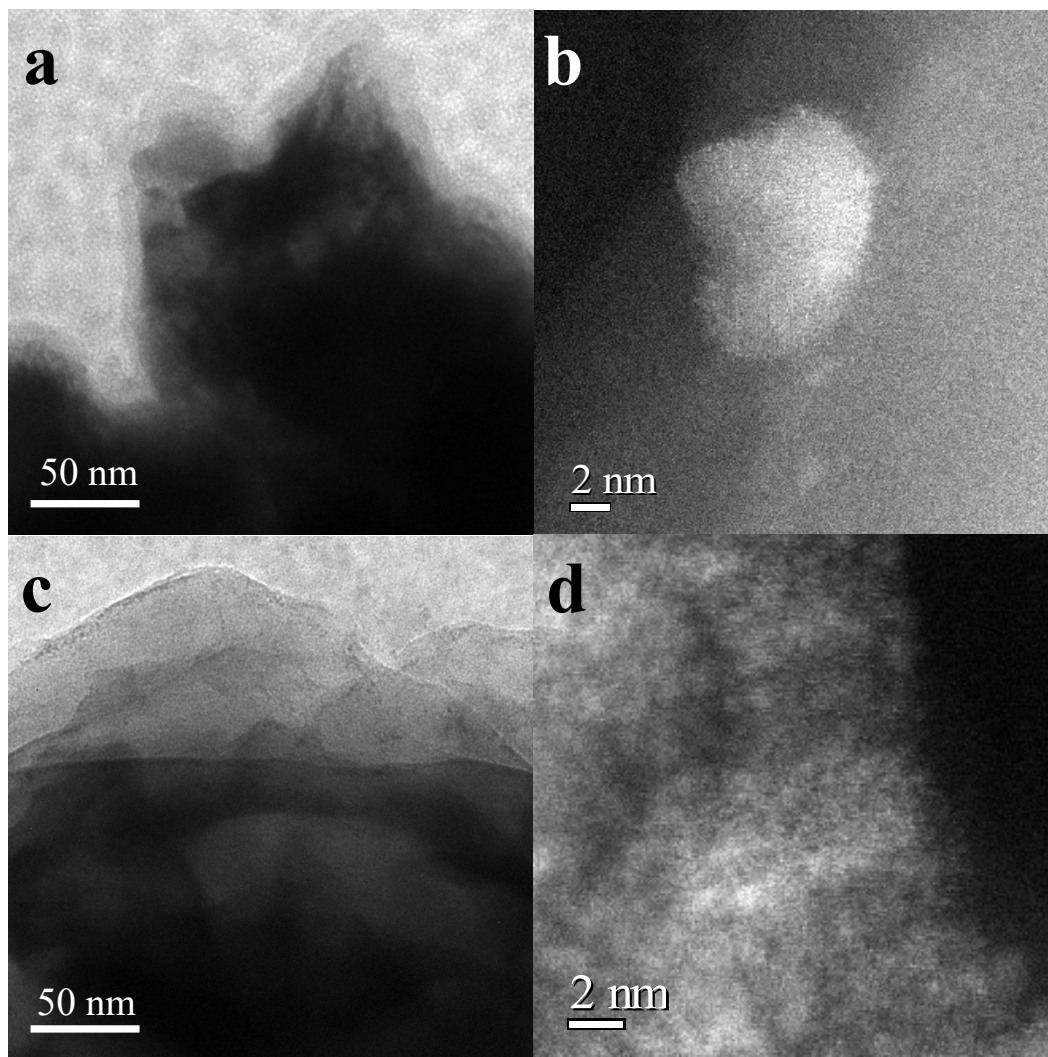

Figure S1 TEM and HAADF-STEM images of the reduced catalysts. (a, b) Rh/Mo<sub>2</sub>C, (c, d) RhK/Mo<sub>2</sub>C.

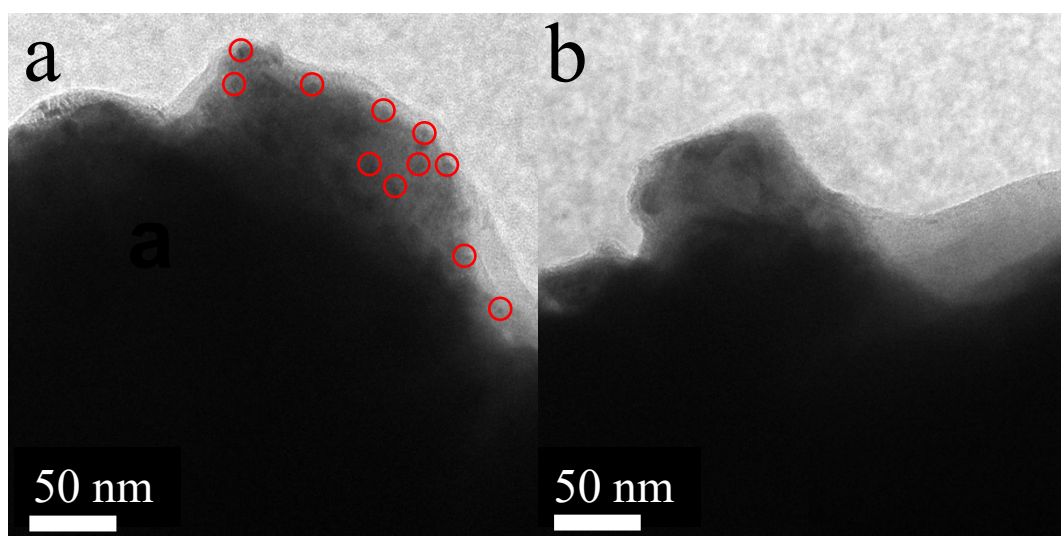

Figure S2 TEM images of the spent catalysts. (a) Rh/Mo<sub>2</sub>C, (b) RhK/Mo<sub>2</sub>C.

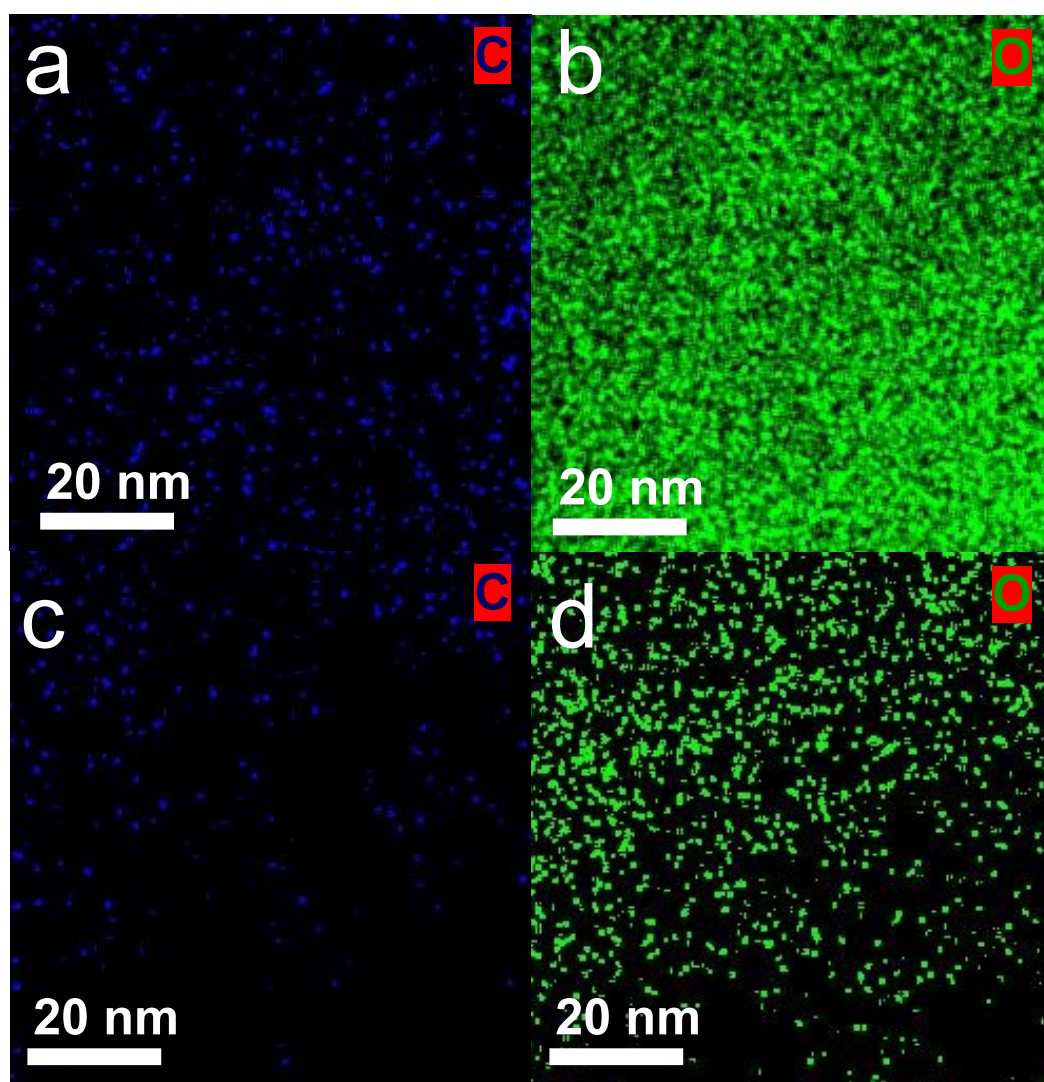

Figure S3 Elemental mapping of C and O for spent Rh/Mo<sub>2</sub>C (a, b) and

---

RhK/Mo<sub>2</sub>C (c, d) catalysts.

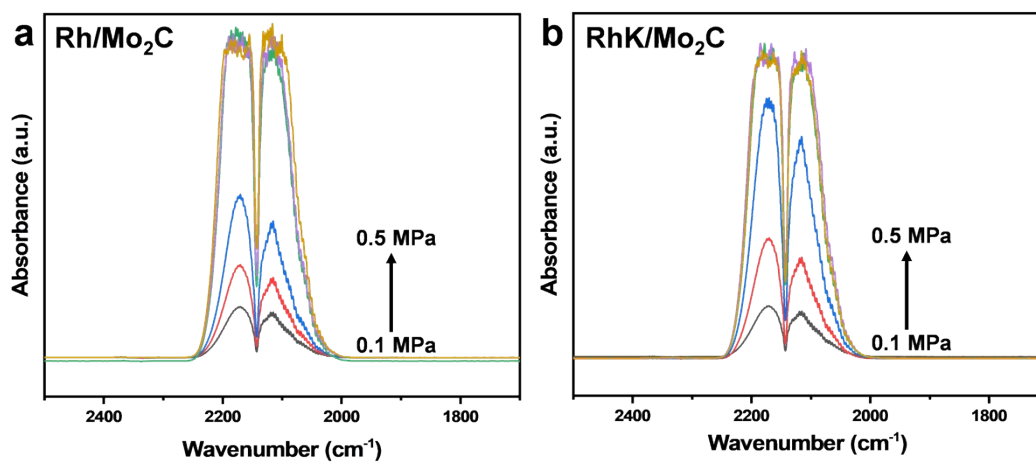

Figure S4 In situ DRIFTs of CO adsorption from 0.1 to 0.5 MPa at 50 °C over Rh/Mo<sub>2</sub>C (a) and RhK/Mo<sub>2</sub>C (b) catalysts.

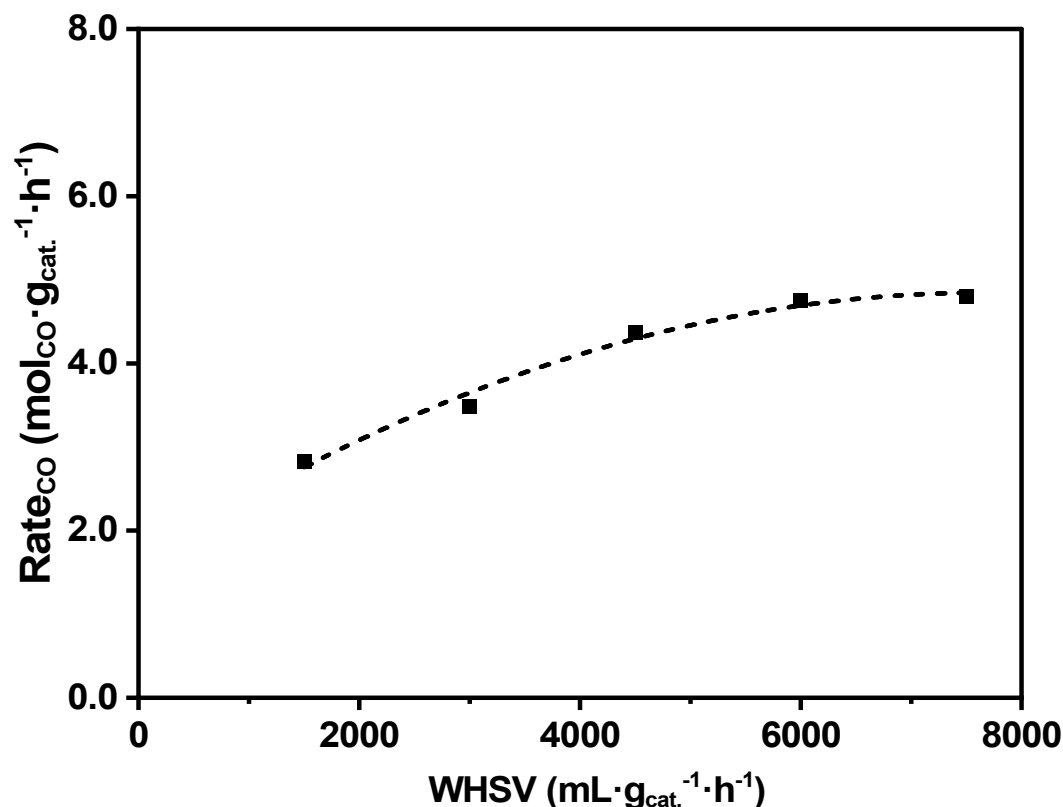

Figure S5 Dependence of CO consumption rate on WHSV.

(Conditions: H<sub>2</sub>/CO=1, 290 °C, 1 MPa, 0.4 g of catalyst diluted with 2 g quartz)

For kinetic study, the diffusion effects were excluded by adjusting the WHSV over RhK/Mo<sub>2</sub>C catalyst. With the increase of WHSV from 1500 to 7500 mL · g<sub>cat.</sub><sup>-1</sup> · h<sup>-1</sup> (Figure S5), CO consumption rate increased and then remained almost constant when WHSV reached 6000 mL · g<sub>cat.</sub><sup>-1</sup> · h<sup>-1</sup>, demonstrating a negligible effect on mass-transfer diffusion when WHSV was higher than 6000 mL · g<sub>cat.</sub><sup>-1</sup> · h<sup>-1</sup>. In the kinetic study, WHSV of 7500 mL · g<sub>cat.</sub><sup>-1</sup> · h<sup>-1</sup> was used to avoid the effect of mass transfer. In addition, to exclude the effect of heat transfer, 0.4 g of catalyst was diluted with 2 g quartz sand to remove the reaction heat.

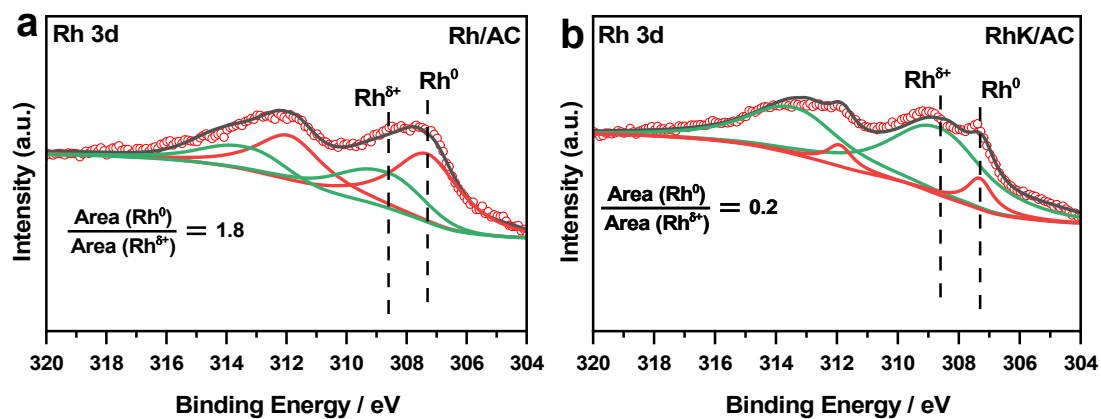

Figure S6 Rh 3d XPS spectra of (a) Rh/AC, (b) RhK/AC after reduction in syngas flow.

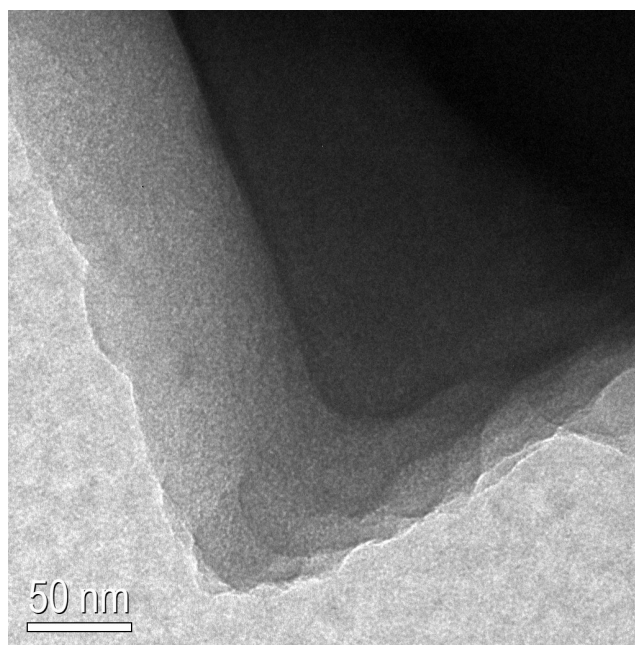

Figure S7. TEM image of the spent RhK/AC catalyst.

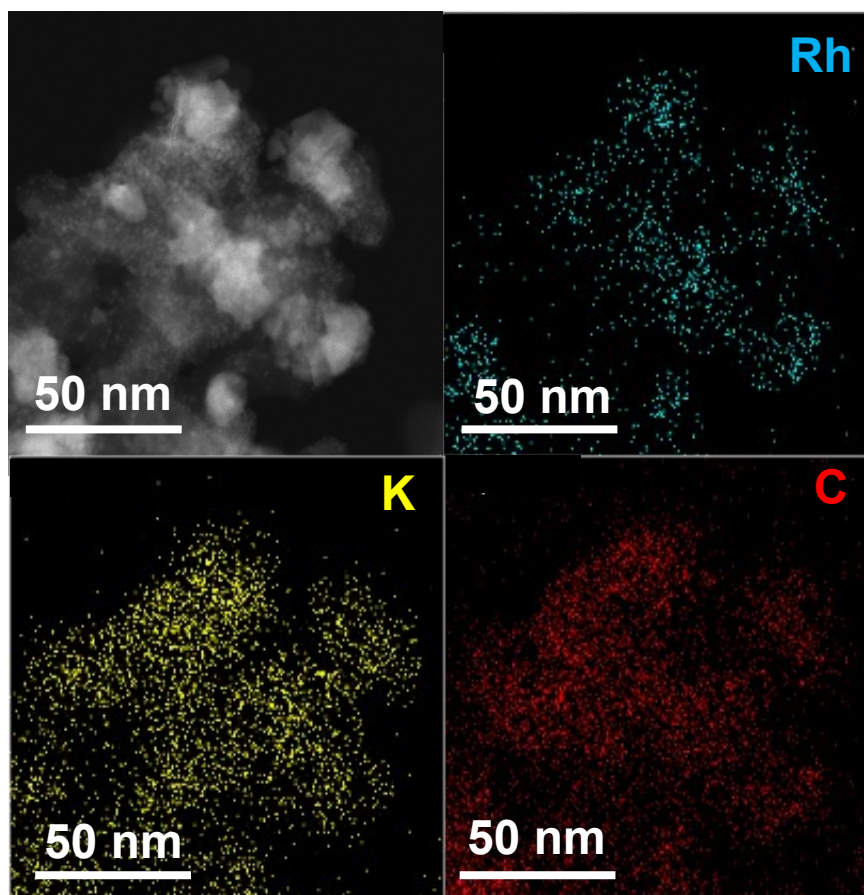

Figure S8. HAADF-STEM image and the corresponding EDS elemental mapping images of the spent RhK/AC catalyst.

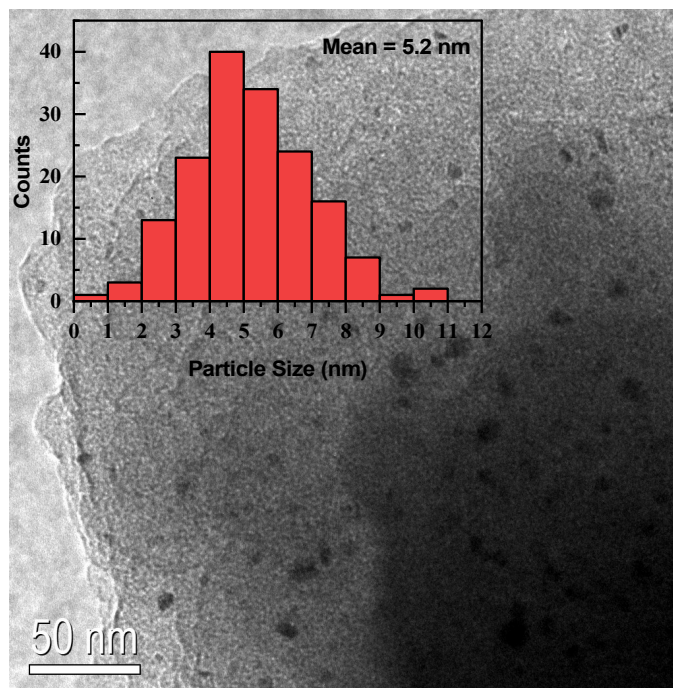

Figure S9. TEM image of the spent Rh/AC catalyst with size distribution of Rh nanoparticles.
